# Supplementary material for: An ultra-small NiFe2O4hollow particle/graphene hybrid: fabrication and electromagnetic wave absorption property
Source: Royal Society of Chemistry journal article supplement (doi:10.1039/c7nr08305j), 2018-01-01
Supplement: c7nr08305j1.pdf [file c7nr08305j1.pdf]

**Electronic Supplementary Information**

**Ultra-small NiFe<sub>2</sub>O<sub>4</sub> hollow particle/graphene hybrid: fabrication and electromagnetic wave absorption property**

Feng Yan,<sup>a,b,c</sup> Dong Guo,<sup>a</sup> Shen Zhang,<sup>a</sup> Chunyan Li,<sup>\*a</sup> Chunling Zhu,<sup>\*b</sup> Xitian Zhang<sup>c</sup> and Yujin Chen<sup>\*a</sup>

<sup>a</sup> Key Laboratory of In-Fiber Integrated Optics, Ministry of Education and College of Science, Harbin Engineering University, Harbin 150001, China.

<sup>b</sup> College of Chemistry and Chemical Engineering, Harbin Engineering University, Harbin 150001, China.

<sup>c</sup> Key Laboratory for Photonic and Electronic Bandgap Materials, Ministry of Education and School of Physics and Electronic Engineering, Harbin Normal University, Harbin 150025, China.

\*Corresponding authors.

Tel.: +086-0451-82519754, Fax: +086-0451-82519754

E-mail addresses: chunyanli@hrbeu.edu.cn (C. Li), zhuchunling@hrbeu.edu.cn (C. Zhu) or chen yujin@hrbeu.edu.cn (Y. Chen).

## Experimental details

**Chemicals.** Graphene sheets were purchased from Nanjing XFNANO Material Tech Co., Ltd. (Nanjing City, China). Ferric acetylacetonate, nickel acetate and ammonia were purchased from Tianjin Kermel Chemical Reagent Co., Ltd. (China). Other reagents were purchased without further purification.

**Synthesis of NiFe<sub>2</sub>O<sub>4</sub>-h/G composite.** Graphene (24 mg) was dispersed in ethanol (72 mL), and then ferric acetylacetonate (57 mg), nickel acetate (150 mg) was added to the mixture above, respectively. After sonication for 15 min, distilled water (3.6 mL) and ammonia (2 mL) were added. The resultant mixture was kept at 80 °C for 10 h under stirring. The precipitate (NiFe hydroxide/G) was obtained by washing with distilled water and ethanol for several times and drying through a freeze-drying process. In the next step, the NiFe hydroxide/G composite was treated in a furnace at 350 °C for 3 h under an H<sub>2</sub>/ Ar flow, then at 200 °C for 3 h and 280 °C for 3 h under air atmosphere, respectively. After cooling to room temperature, the NiFe<sub>2</sub>O<sub>4</sub>-h/G composite was obtained.

**Synthesis of NiFe<sub>2</sub>O<sub>4</sub>-s/G and NiFe<sub>2</sub>O<sub>4</sub>-s composites.** As a comparison, NiFe<sub>2</sub>O<sub>4</sub>-s/G was synthesized under the similar conditions except that the thermal treatment of NiFe hydroxide/G composite was carried out 200°C for 3 h and 280°C for 3 h under air atmosphere. Solid NiFe<sub>2</sub>O<sub>4</sub> NPs were synthesized through the reported method.<sup>1</sup>

**Structure Characterizations.** XRD data were measured by a Rigaku D/max-2600/PC with Cu K $\alpha$  radiation ( $\lambda=1.5418\text{\AA}$ ). The morphology and size of samples were characterized by scanning electron microscope (Hitachi SU70) and an FEI

Tecnai-F20 transmission electron microscope equipped with a Gatan imaging filter (GIF). BET surface area and pore volume were tested with a Quantachrome Instruments NOVA4000 after the composites were vacuum dried at 200°C over 10 h. XPS analyses were carried out by using a spectrometer with Mg K $\alpha$  radiation (PHI 5700 ESCA System). The binding energy was calibrated with the C 1s position of contaminant carbon in the vacuum chamber of the XPS instrument (284.6 eV). The magnetic property of the NiFe<sub>2</sub>O<sub>4</sub> hollow particle was measured by a vibrating sample magnetometer (VSM; Lakeshore 7410) at room temperature.

**The size calculation of the NiFe<sub>2</sub>O<sub>4</sub> NPs by Scherrer equation.** The crystallite sizes of the NiFe<sub>2</sub>O<sub>4</sub> NPs with different relevant data of crystal planes are calculated by Scherrer equation:

$$D = 0.9\lambda / \beta \cos \theta$$

where  $D$  is the crystallite size,  $\lambda$  is the X-ray wavelength (0.15418 nm),  $\beta$  is the half-maximum breadth and  $\theta$  is the Bragg angle of different planes.

**Electromagnetic parameter Measurements.** The electromagnetic parameters of the absorbers were measured by using a vector network analyzer (Anritsu MS4644A Vectorstar). The cylindrical sample (with 3.00 mm inner diameter, 7.00 mm outer diameter and 3.00 mm thickness) was prepared by mixing the absorbing materials with a paraffin matrix and the addition amount of absorbing materials into paraffin matrix paraffin matrix was controlled to be 15 wt%. Before measurement, the electromagnetic parameter was verified by standard Teflon sample with the same shape and size as the tested sample.

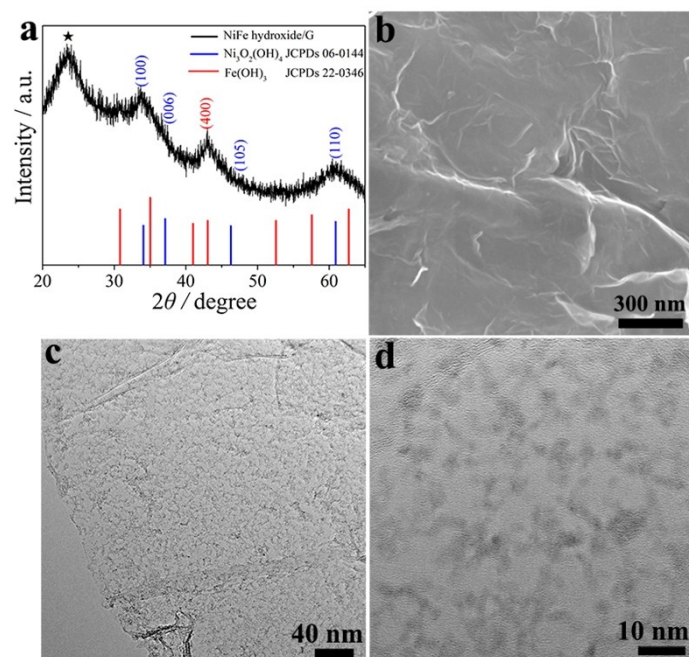

**Fig. S1** (a) The XRD pattern, (b) low-magnification SEM image, (c) low-magnification image and (d) middle-magnification TEM image of NiFe hydroxide/G.

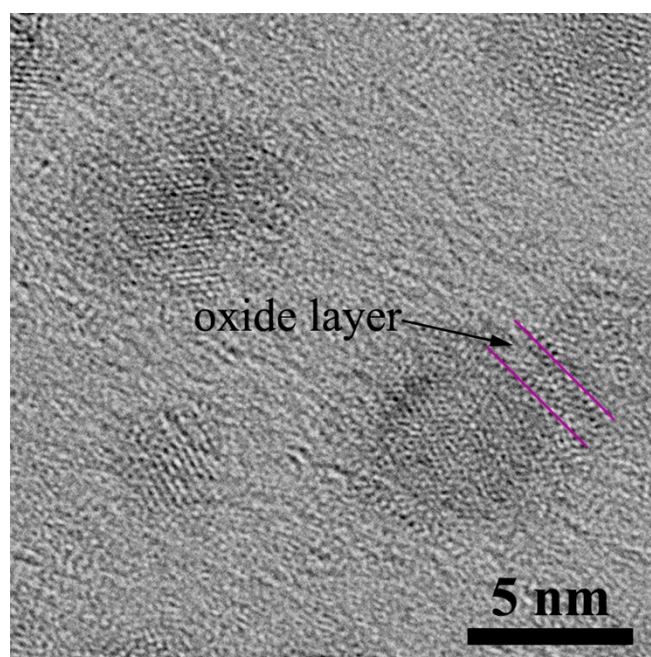

**Fig. S2** The HRTEM image of NiFe/G.

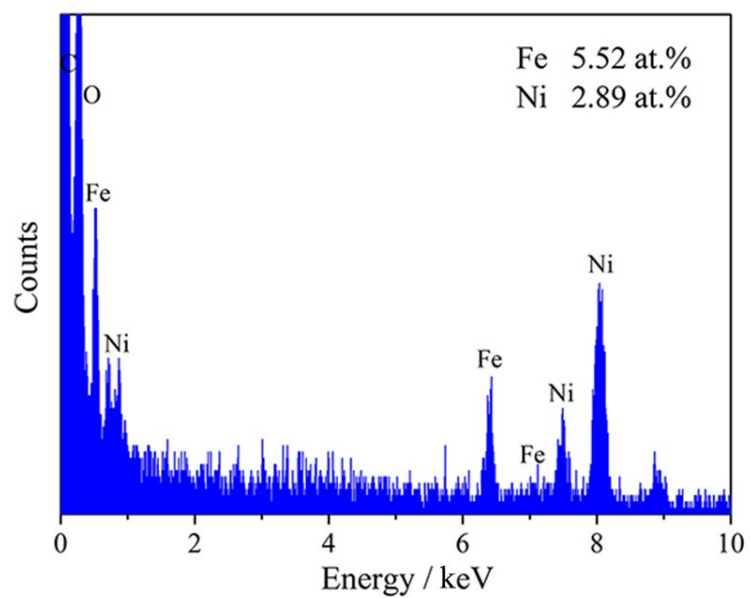

**Fig. S3** The EDX pattern of NiFe<sub>2</sub>O<sub>4</sub>-h/G.

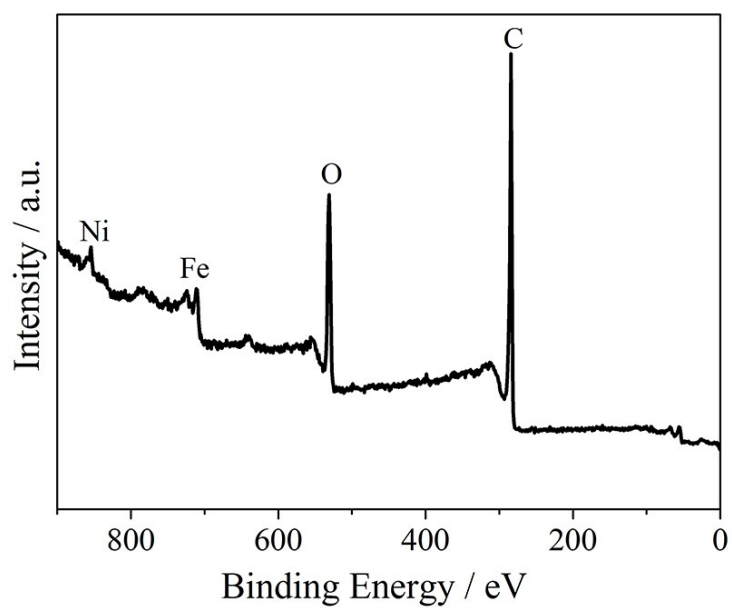

**Fig. S4** The survey XPS spectrum of NiFe<sub>2</sub>O<sub>4</sub>-h/G.

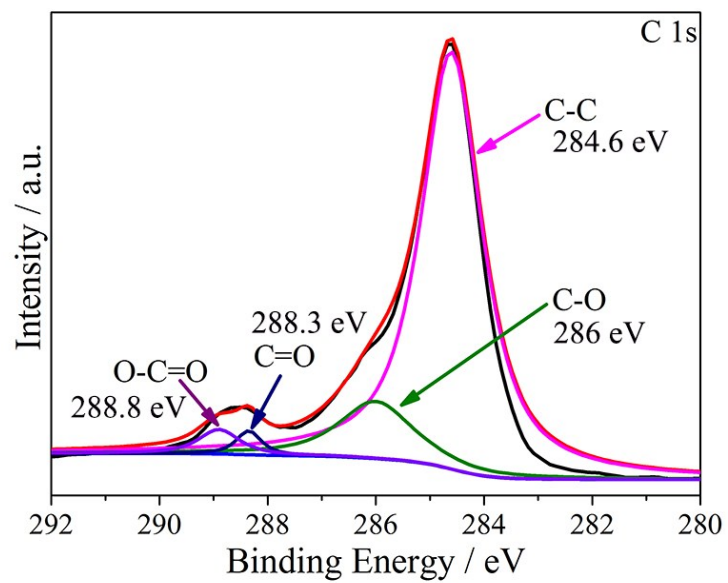

**Fig. S5** The XPS spectra of C 1s core level spectrum for NiFe<sub>2</sub>O<sub>4</sub>-h/G hybrid.

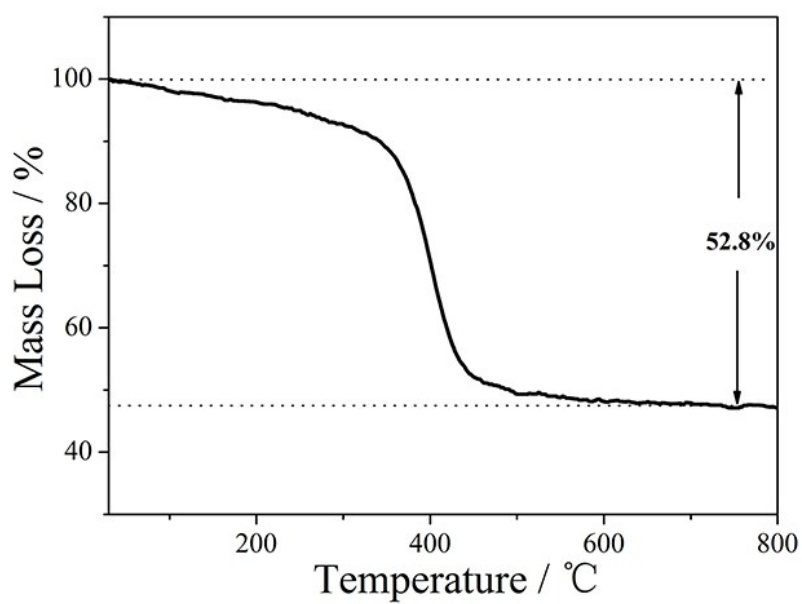

**Fig. S6** The TGA analysis of NiFe<sub>2</sub>O<sub>4</sub>-h/G.

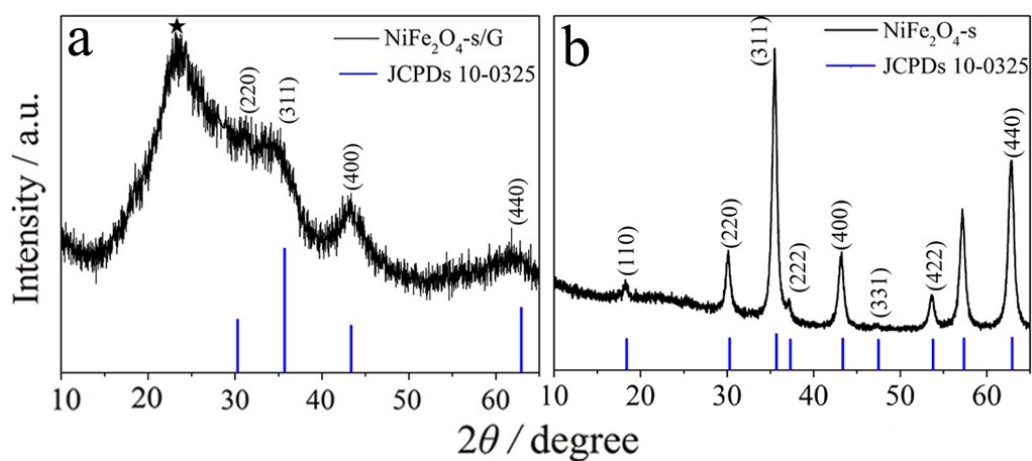

**Fig. S7** The XRD patterns of (a)  $\text{NiFe}_2\text{O}_4\text{-s/G}$  and (b)  $\text{NiFe}_2\text{O}_4\text{-s}$ .

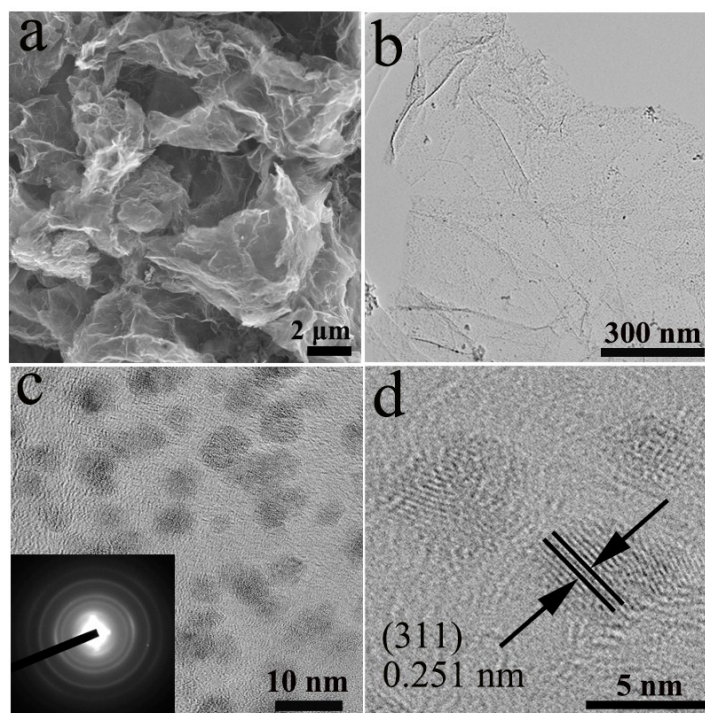

**Fig. S8** (a) The Low-magnification SEM image of  $\text{NiFe}_2\text{O}_4\text{-s/G}$ . (b,c) TEM and (d) HRTEM images of  $\text{NiFe}_2\text{O}_4\text{-s/G}$ . The inset of (c) shows the corresponding SAED pattern.



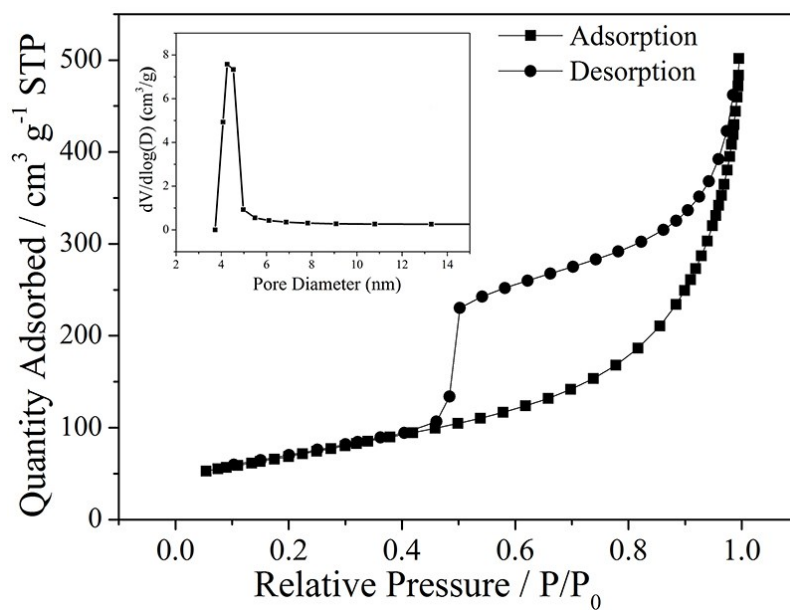

**Fig. S9** Nitrogen adsorption and desorption isotherms of NiFe<sub>2</sub>O<sub>4</sub>-s/G. The inset shows the corresponding pore-size distribution calculated by the BJH method.

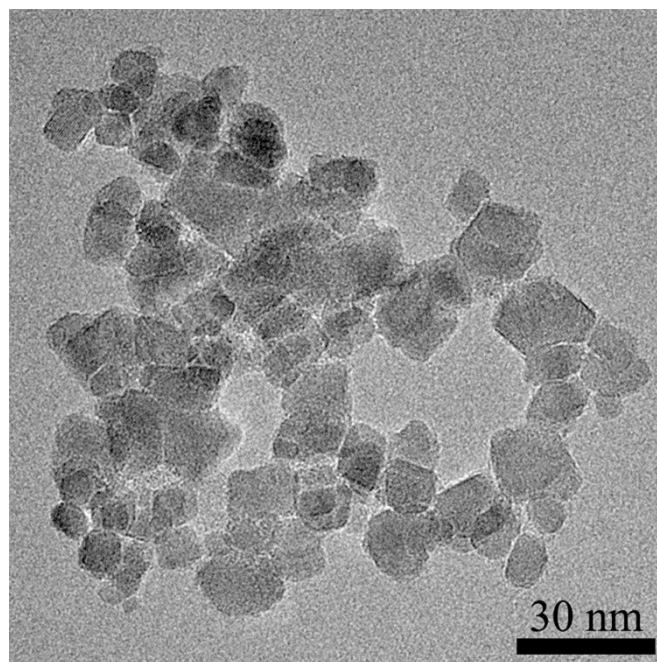

**Fig. S10** The TEM image of NiFe<sub>2</sub>O<sub>4</sub>-s.



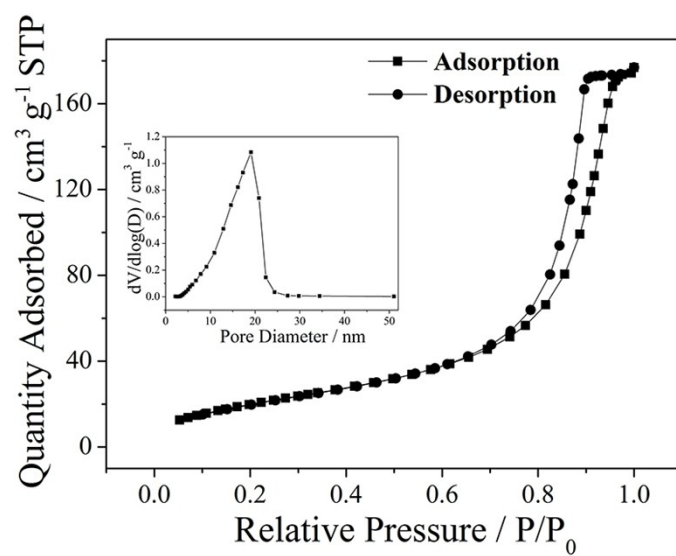

**Fig. S11** Nitrogen adsorption and desorption isotherms of  $\text{NiFe}_2\text{O}_4$ -s. The inset shows the corresponding pore-size distribution calculated by the BJH method.

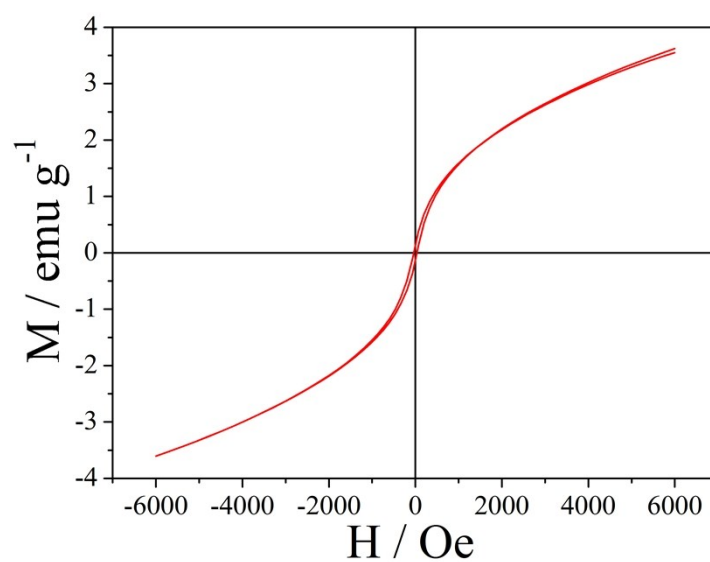

**Fig. S12** Magnetization hysteresis loops of the  $\text{NiFe}_2\text{O}_4$ -h/G.

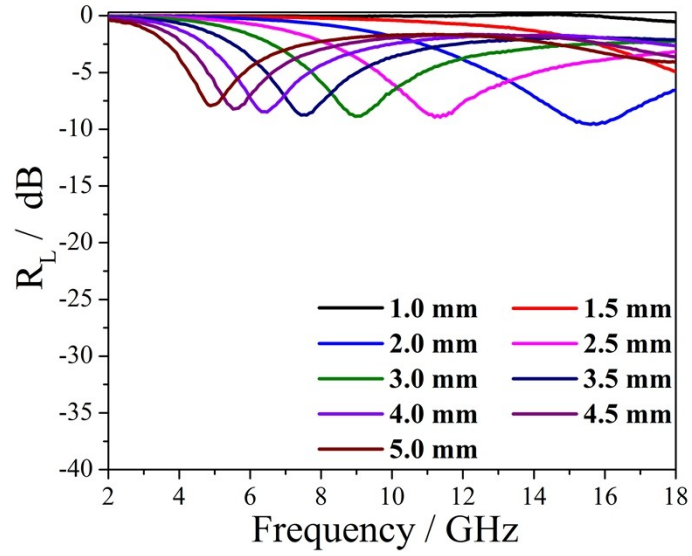

**Fig. S13** The  $R_L$ - $f$  curves of graphene sheets with different thicknesses in the frequency range of 2 – 18 GHz.

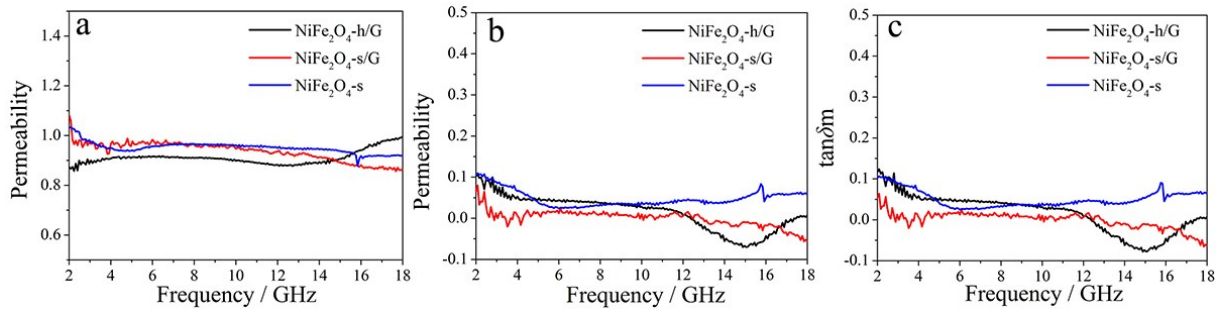

**Fig. S14** (a) The real part of relative permeability, (b) imaginary part of relative permeability and (c) magnetic loss tangent of  $\text{NiFe}_2\text{O}_4$ -s,  $\text{NiFe}_2\text{O}_4$ -s/G and  $\text{NiFe}_2\text{O}_4$ -h/G.

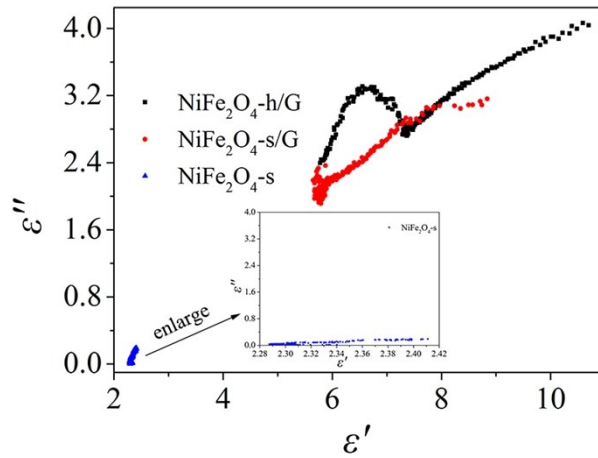

**Fig. S15** The Cole-Cole semicircles of  $\text{NiFe}_2\text{O}_4$ -s,  $\text{NiFe}_2\text{O}_4$ -s/G and  $\text{NiFe}_2\text{O}_4$ -h/G. The inset shows the Cole-Cole semicircles of  $\text{NiFe}_2\text{O}_4$ -s in a high magnification resolution.

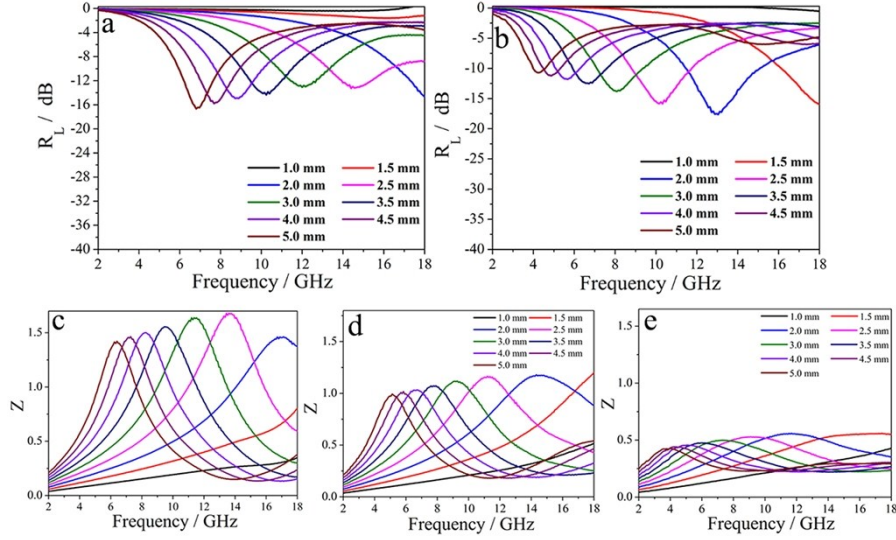

**Fig. S16** (a, b) The  $R_L$ - $f$  curves of the  $\text{NiFe}_2\text{O}_4$ -h/G with 10 and 20wt% of the addition amount in the frequency range of 2 – 18 GHz, respectively. (c-e) The modulus of the normalized characteristic impedance ( $Z=|Z_{in}/Z_0|$ ) for the  $\text{NiFe}_2\text{O}_4$ -h/G with 10, 15 and 20 wt% of the addition amount, respectively.

**Note:** The  $R_L$  is highly relevant to the matched characteristic impedance. If the input impedance of an absorber matches well with the impedance of free space, most incident EMW can enter into the absorber material and then will be converted to thermal energy or dissipated through interference. Usually, the normalized characteristic impedance ( $Z_{in}/Z_0$ ) can calculate from  $\epsilon_r$  and  $\mu_r$  by the following equations:

$$Z_{in} = Z_0 \sqrt{\mu_r / \epsilon_r} \tanh[j(2\pi f d / c) \sqrt{\mu_r \epsilon_r}] \quad (1)$$

when  $Z$  (the modulus of the normalized characteristic impedance,  $Z = |Z_{in}/Z_0|$ ) is equal or close to 1, the absorber will possess good impedance matching characteristic. As shown in S16c-e, the values for the  $\text{NiFe}_2\text{O}_4$ -h/G with 15 wt% of the addition amount are more near to 1 at  $d$  ranging from 3.5 to 5.0 mm than those for the  $\text{NiFe}_2\text{O}_4$ -h/G with 10 wt% of the addition amount and for the  $\text{NiFe}_2\text{O}_4$ -h/G with 20 wt% of the addition amount, indicating the best impedance matching property of the  $\text{NiFe}_2\text{O}_4$ -h/G with 15 wt% of the addition amount among these composites.

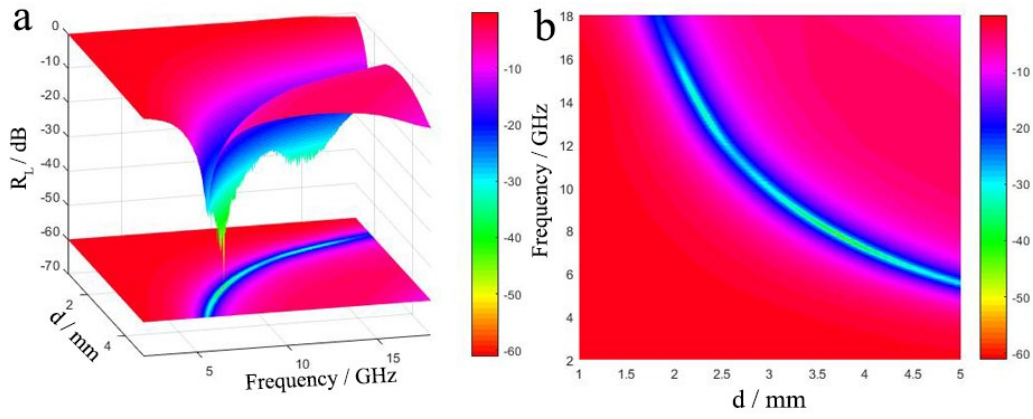

**Fig. S17** Three-dimensional representation of  $R_L$  values for  $\text{NiFe}_2\text{O}_4\text{-h/G}$  with different thicknesses in the frequency range of 2 – 18 GHz.

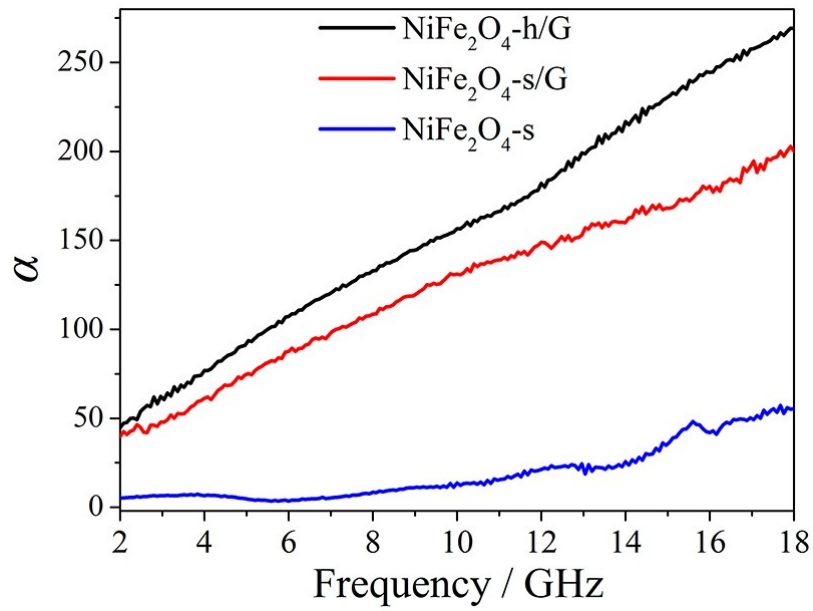

**Fig. S18** The attenuation constants of  $\text{NiFe}_2\text{O}_4\text{-s}$ ,  $\text{NiFe}_2\text{O}_4\text{-s/G}$  and  $\text{NiFe}_2\text{O}_4\text{-h/G}$  in the frequency range of 2 – 18 GHz.

**Table S1.** The crystallite sizes of the NiFe<sub>2</sub>O<sub>4</sub> NPs calculated in terms of different relevant data of lattice planes.

| crystal planes | $\cos\theta$ | $\beta$ | $D$     |
|----------------|--------------|---------|---------|
| (311)          | 0.952        | 7.981°  | ~1.0 nm |
| (400)          | 0.929        | 3.528°  | ~2.4 nm |
| (440)          | 0.853        | 3.123°  | ~3.0 nm |

**Table S2.** Comparison of the efficient absorption widths between NiFe<sub>2</sub>O<sub>4</sub>-h/G and NiFe<sub>2</sub>O<sub>4</sub>-s/G at different thickness.

| $d$ (mm)                              |     |     |     |     |     |     |
|---------------------------------------|-----|-----|-----|-----|-----|-----|
|                                       | 2.5 | 3   | 3.5 | 4   | 4.5 | 5   |
| EBWs (GHz)                            |     |     |     |     |     |     |
| NiFe <sub>2</sub> O <sub>4</sub> -h/G | 4.5 | 3.3 | 2.8 | 2.4 | 1.3 | 1.8 |
| NiFe <sub>2</sub> O <sub>4</sub> -s/G | 3.9 | 3.4 | 3.0 | 2.7 | 2.4 | 2.0 |

**Table S3.** Comparison of EMW absorption properties of NiFe<sub>2</sub>O<sub>4</sub>-h/G with those of other absorbing materials.

| Materials                                              | Minimal $R_L$<br>(dB) | $d$<br>(mm) | EBW<br>(GHz) | C (wt<br>%) | Ref.      |
|--------------------------------------------------------|-----------------------|-------------|--------------|-------------|-----------|
| RGO/NiFe <sub>2</sub> O <sub>4</sub>                   | -39.7                 | 3.0         | ~3.0         | 50          | [2]       |
| NiFe <sub>2</sub> O <sub>4</sub> nanorod-graphene      | -44.6                 | 4.0         | ~2.6         | 60          | [3]       |
| NiFe <sub>2</sub> O <sub>4</sub> nanoparticle-graphene | -27.9                 | 4.0         | ~2.7         | 60          |           |
| NiFe <sub>2</sub> O <sub>4</sub> -polystyrene          | -13.0                 | 2.0         | 2.7          | 65          | [4]       |
| CoFe <sub>2</sub> O <sub>4</sub> /graphene             | -24.7                 | 4.0         | ~2.4         | 60          | [5]       |
| graphene-Fe <sub>3</sub> O <sub>4</sub> /ZnO           | -40.0                 | 5.0         | ~1.7         | 30          | [6]       |
| FeCo/graphene                                          | -40.2                 | 2.5         | ~4.1         | 50          | [7]       |
| Co <sub>20</sub> Ni <sub>80</sub>                      | -33.5                 | 5.0         | ~1.8         | -           | [8]       |
| Co <sub>3</sub> O <sub>4</sub> /RGO                    | -32.3                 | 2.5         | ~5.2         | 20          | [9]       |
| Ni fiber                                               | -39.5                 | 3.0         | ~1.1         | 50          | [10]      |
| Porous Co/C                                            | -35.3                 | 4.0         | ~2.4         | 40          | [11]      |
| Graphene/Fe <sub>3</sub> O <sub>4</sub> @Fe/ZnO        | -38.4                 | 5.0         | ~2.9         | 20          | [12]      |
| Fe <sub>3</sub> O <sub>4</sub> /GCs                    | -32.0                 | 3.5         | ~4.8         | 30          | [13]      |
| NiFe <sub>2</sub> O <sub>4</sub> -s/G                  | -20.2                 | 5.0         | 2.1          | 15          | This work |
| NiFe <sub>2</sub> O <sub>4</sub> -h/G                  | -40.9                 | 3.5         | 2.8          | 15          | This work |

## REFERENCES

1. P. B. Liu, Y. Huang and X. Zhang, *Composites Science and Technology* 2014, **95**, 107.
2. M. Zong, Y. Huang, X. Ding, N. Zhang, C. H. Qu and Y. L. Wang, *Ceramics International* 2014, **40**, 6821.
3. M. Fu, Q. Z. Jiao and Yun. Zhao, *J. Mater. Chem. A* 2013, **1**, 5577.
4. H. T. Zhao, X. D. Sun, C. H. Mao and J. Du, *Physica B* 2009, **404**, 69.
5. M. Fu, Q. Z. Jiao, Y. Zhao and H. S. Li, *J. Mater. Chem. A* 2014, **2**, 735.
6. D. P. Sun, Q. Zou, Y. P. Wang, Y. J. Wang, W. Jiang and F. S. Li, *Nanoscale* 2014, **6**, 6557.
7. X. H. Li, J. Feng, Y. P. Du, J. T. Bai, H. M. Fan, H. L. Zhang, Y. Peng and F. S. Li, *J. Mater. Chem. A*, 2015, **3**, 5535.
8. Q. H. Liu, X. H. Xu, W. X. Xia, R. C. Che, C. Chen, Q. Cao and J. G. He, *Nanoscale* 2015, **7**, 1736.
9. X. B. Li, S. W. Yang, J. Sun, P. He, X. P. Pu and G. Q. Ding, *Synthetic Metals* 2014, **194**, 52.
10. C. H. Gong, J. W. Zhang, X. F. Zhang, L. G. Yu, P. Y. Zhang, Z. S. Wu and Z. J. Zhang, *J. Phys. Chem. C* 2010, **114**, 10101.
11. Y. Y. Lü, Y. T. Wang, H. L. Li, Y. Lin, Z. Y. Jiang, Z. X. Xie, Q. Kuang and L. S. Zheng, *ACS Appl. Mater. Interfaces* 2015, **7**, 13604.
12. Y. L. Ren, H. Y. Wu, M. M. Lu, Y. J. Chen, C. L. Zhu, P. Gao, M. S. Cao, C. Y. Li and Q. Y. Ouyang, *ACS Appl. Mater. Interfaces* 2012, **4**, 6436.

13. X. Jian, B. Wu, Y. F. Wei, S. X. Dou, X. L. Wang, W. D. He and N. Mahmood,  
*ACS Appl. Mater. Interfaces* 2016, **8**, 6101.
